# Supplementary material
Source: Springer Nature journal article supplement (https://www.springermedizin.de/resource/supplementary/12950_2009_156_MOESM4_ESM.pdf/9558080)

A

## Cocktail stimulated PGE2 secretion

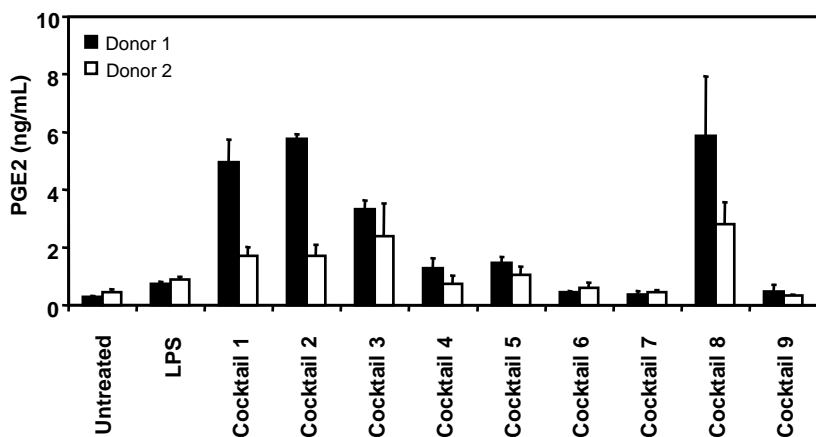

B

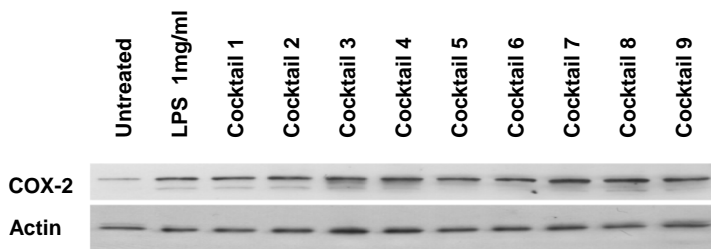

C

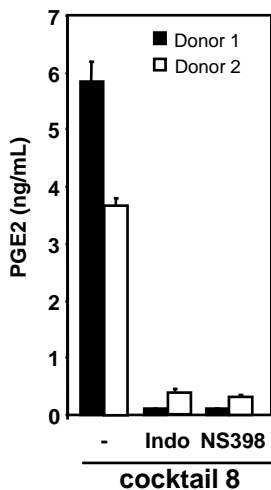

D

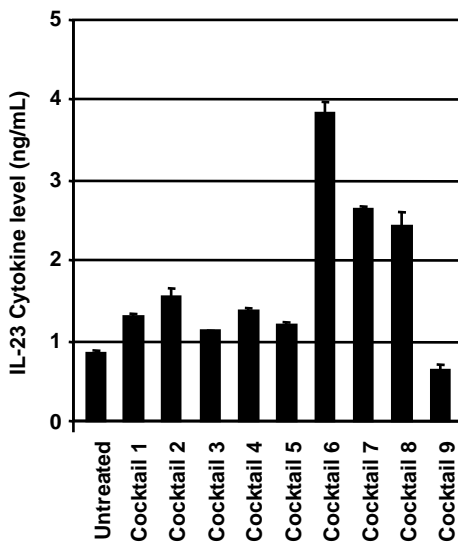

Supplement: MOESM4 [file 9558080]
